# Supplementary material for: Multicomponent Training and Optimal Dosing Strategies for Adults with Hypertension: A Systematic Review and Meta-Analysis of Randomized Controlled Trials
Source: MDPI journal article supplement (doi:10.3390/sports11060115), 2023-06-08
Supplement: s1 [file s1]

# Supplementary material

Supplementary Table S1. Search strategy

|          |                                                                                                                                                                                                                                                                                                                                                                                                                                                                                                                                                                                                                                                                                                                                                                                                                                                                                                                                                                                                                                                                                                                                                                                                                                                                                                                                                                                                                                                                                                                                                                                                                                                                                                                                              |
|----------|----------------------------------------------------------------------------------------------------------------------------------------------------------------------------------------------------------------------------------------------------------------------------------------------------------------------------------------------------------------------------------------------------------------------------------------------------------------------------------------------------------------------------------------------------------------------------------------------------------------------------------------------------------------------------------------------------------------------------------------------------------------------------------------------------------------------------------------------------------------------------------------------------------------------------------------------------------------------------------------------------------------------------------------------------------------------------------------------------------------------------------------------------------------------------------------------------------------------------------------------------------------------------------------------------------------------------------------------------------------------------------------------------------------------------------------------------------------------------------------------------------------------------------------------------------------------------------------------------------------------------------------------------------------------------------------------------------------------------------------------|
| PubMed   | ((hypertension[Title] OR (blood pressure[Title] OR (systolic[Title] OR (diastolic[Title] OR (hypertensive[title])) AND ((aerobic*[Title] OR (endurance*[Title] OR (weight*[Title] OR (HIIT[Title] OR (MICT[Title] OR (fitness([Title] OR (resistance[Title] OR (combined[Title] OR (multicomponent[Title])))))                                                                                                                                                                                                                                                                                                                                                                                                                                                                                                                                                                                                                                                                                                                                                                                                                                                                                                                                                                                                                                                                                                                                                                                                                                                                                                                                                                                                                               |
| Cochrane | (hypertension):ti AND (aerobic*):ti"<br>(hypertension):ti AND (endurance*):ti"<br>(hypertension):ti AND weight*):ti"<br>(hypertension):ti AND HIIT):ti"<br>(hypertension):ti AND MICT):ti"<br>(hypertension):ti AND fitness):ti"<br>(hypertension):ti AND resistance):ti"<br>(hypertension):ti Combined):ti"<br>(hypertension):ti multicomponent):ti"<br>(blood pressure):ti AND (aerobic*):ti"<br>(blood pressure):ti AND (endurance*):ti"<br>(blood pressure):ti AND weight*):ti"<br>(blood pressure):ti AND HIIT):ti"<br>(blood pressure):ti AND MICT):ti"<br>(blood pressure):ti AND fitness):ti"<br>(blood pressure):ti AND resistance):ti"<br>(blood pressure):ti Combined):ti"<br>(blood pressure):ti multicomponent):ti"<br>(systolic):ti AND (aerobic*):ti"<br>(systolic):ti AND (endurance*):ti"<br>(systolic):ti AND weight*):ti"<br>(systolic):ti AND HIIT):ti"<br>(systolic):ti AND MICT):ti"<br>(systolic):ti AND fitness):ti"<br>(systolic):ti AND resistance):ti"<br>(systolic):ti Combined):ti"<br>(systolic):ti multicomponent):ti"<br>(diastolic):ti AND (aerobic*):ti"<br>(diastolic):ti AND (endurance*):ti"<br>(diastolic):ti AND weight*):ti"<br>(diastolic):ti AND HIIT):ti"<br>(diastolic):ti AND MICT):ti"<br>(diastolic):ti AND fitness):ti"<br>(diastolic):ti AND resistance):ti"<br>(diastolic):ti Combined):ti"<br>(diastolic):ti multicomponent):ti"<br>(hypertensive):ti AND (aerobic*):ti"<br>(hypertensive):ti AND (endurance*):ti"<br>(hypertensive):ti AND weight*):ti"<br>(hypertensive):ti AND HIIT):ti"<br>(hypertensive):ti AND MICT):ti"<br>(hypertensive):ti AND fitness):ti"<br>(hypertensive):ti AND resistance):ti"<br>(hypertensive):ti Combined):ti"<br>(hypertensive):ti multicomponent):ti" |

|       |                                                                                                                                                                                                                                                                                                                                                                                                                                                                                                                                                                                                                                                                                                                                                                                                                                                                                                                                                                                                                                                                                                                                                                                                                                                                                                                                                                                                                                                                                                                                                                                                                                                                                                                                                                                                                                                                            |
|-------|----------------------------------------------------------------------------------------------------------------------------------------------------------------------------------------------------------------------------------------------------------------------------------------------------------------------------------------------------------------------------------------------------------------------------------------------------------------------------------------------------------------------------------------------------------------------------------------------------------------------------------------------------------------------------------------------------------------------------------------------------------------------------------------------------------------------------------------------------------------------------------------------------------------------------------------------------------------------------------------------------------------------------------------------------------------------------------------------------------------------------------------------------------------------------------------------------------------------------------------------------------------------------------------------------------------------------------------------------------------------------------------------------------------------------------------------------------------------------------------------------------------------------------------------------------------------------------------------------------------------------------------------------------------------------------------------------------------------------------------------------------------------------------------------------------------------------------------------------------------------------|
| WOS   | (TI=(hypertension)) AND TI= (aerobic*)<br>(TI=(hypertension)) AND TI= (endurance*)<br>(TI=(hypertension)) AND TI=(weight*)<br>(TI=(hypertension)) AND TI=(HIIT)<br>(TI=(hypertension)) AND TI=(MICT)<br>(TI=(hypertension)) AND TI=(fitness)<br>(TI=(hypertension)) AND TI=(resistance)<br>(TI=(hypertension)) AND TI=(Combined)<br>(TI=(hypertension)) AND TI=(multicomponent)<br>(TI=(blood pressure)) AND TI=(aerobic*)<br>(TI=(blood pressure)) AND TI= (endurance*)<br>(TI=(blood pressure)) AND TI=(weight*)<br>(TI=(blood pressure)) AND TI=(HIIT)<br>(TI=(blood pressure)) AND TI=(MICT)<br>(TI=(blood pressure)) AND TI=(fitness)<br>(TI=(blood pressure)) AND TI=(resistance)<br>(TI=(blood pressure)) AND TI=(Combined)<br>(TI=(blood pressure)) AND TI=(multicomponent)<br>(TI=(systolic)) AND TI=(aerobic*)<br>(TI=(systolic)) AND TI= (endurance*)<br>(TI=(systolic)) AND TI=(weight*)<br>(TI=(systolic)) AND TI=(HIIT)<br>(TI=(systolic)) AND TI=(MICT)<br>(TI=(systolic)) AND TI=(fitness)<br>(TI=(systolic)) AND TI=(resistance)<br>(TI=(systolic)) AND TI=(Combined)<br>(TI=(systolic)) AND TI=(multicomponent)<br>(TI=(diastolic)) AND TI= (aerobic*)<br>(TI=(diastolic)) AND TI= (endurance*)<br>(TI=(diastolic)) AND TI=(weight*)<br>(TI=(diastolic)) AND TI=(HIIT)<br>(TI=(diastolic)) AND TI=(MICT)<br>(TI=(diastolic)) AND TI=(fitness)<br>(TI=(diastolic)) AND TI=(resistance)<br>(TI=(diastolic)) AND TI=(Combined)<br>(TI=(diastolic)) AND TI=(multicomponent)<br>(TI=(hypertensive)) AND TI=(aerobic*)<br>(TI=(hypertensive)) AND TI=(endurance*)<br>(TI=(hypertensive)) AND TI=(weight*)<br>(TI=(hypertensive)) AND TI=(HIIT)<br>(TI=(hypertensive)) AND TI=(MICT)<br>(TI=(hypertensive)) AND TI=(fitness)<br>(TI=(hypertensive)) AND TI=(resistance)<br>(TI=(hypertensive)) AND TI=(Combined)<br>(TI=(hypertensive)) AND TI=(multicomponent) |
| EBSCO | TI hypertension AND TI aerobic*<br>TI hypertension AND TI endurance*<br>TI hypertension AND TI weight*<br>TI hypertension AND TI HIIT<br>TI hypertension AND TI MICT<br>TI hypertension AND TI fitness<br>TI hypertension AND TI resistance<br>TI hypertension AND TI Combined<br>TI hypertension AND TI multicomponent<br>TI blood pressure AND TI aerobic*                                                                                                                                                                                                                                                                                                                                                                                                                                                                                                                                                                                                                                                                                                                                                                                                                                                                                                                                                                                                                                                                                                                                                                                                                                                                                                                                                                                                                                                                                                               |

|  |                                                                                                                                                                                                                                                                                                                                                                                                                                                                                                                                                                                                                                                                                                                                                                                                                                                                                                                                                                                                                                                                                                                                                                                                                                                                                                     |
|--|-----------------------------------------------------------------------------------------------------------------------------------------------------------------------------------------------------------------------------------------------------------------------------------------------------------------------------------------------------------------------------------------------------------------------------------------------------------------------------------------------------------------------------------------------------------------------------------------------------------------------------------------------------------------------------------------------------------------------------------------------------------------------------------------------------------------------------------------------------------------------------------------------------------------------------------------------------------------------------------------------------------------------------------------------------------------------------------------------------------------------------------------------------------------------------------------------------------------------------------------------------------------------------------------------------|
|  | <p> TI blood pressure AND TI endurance*<br/> TI blood pressure AND TI weight*<br/> TI blood pressure AND TI HIIT<br/> TI blood pressure AND TI MICT<br/> TI blood pressure AND TI fitness<br/> TI blood pressure AND TI resistance<br/> TI blood pressure AND TI Combined<br/> TI blood pressure AND TI multicomponent<br/> TI systolic AND TI aerobic*<br/> TI systolic AND TI endurance*<br/> TI systolic AND TI weight*<br/> TI systolic AND TI HIIT<br/> TI systolic AND TI MICT<br/> TI systolic AND TI fitness<br/> TI systolic AND TI resistance<br/> TI systolic AND TI Combined<br/> TI systolic AND TI multicomponent<br/> TI diastolic AND TI aerobic*<br/> TI diastolic AND TI endurance*<br/> TI diastolic AND TI weight*<br/> TI diastolic AND TI HIIT<br/> TI diastolic AND TI MICT<br/> TI diastolic AND TI fitness<br/> TI diastolic AND TI resistance<br/> TI diastolic AND TI Combined<br/> TI diastolic AND TI multicomponent<br/> TI hypertensive AND TI aerobic*<br/> TI hypertensive AND TI endurance*<br/> TI hypertensive AND TI weight*<br/> TI hypertensive AND TI HIIT<br/> TI hypertensive AND TI MICT<br/> TI hypertensive AND TI fitness<br/> TI hypertensive AND TI resistance<br/> TI hypertensive AND TI Combined<br/> TI hypertensive AND TI multicomponent </p> |
|--|-----------------------------------------------------------------------------------------------------------------------------------------------------------------------------------------------------------------------------------------------------------------------------------------------------------------------------------------------------------------------------------------------------------------------------------------------------------------------------------------------------------------------------------------------------------------------------------------------------------------------------------------------------------------------------------------------------------------------------------------------------------------------------------------------------------------------------------------------------------------------------------------------------------------------------------------------------------------------------------------------------------------------------------------------------------------------------------------------------------------------------------------------------------------------------------------------------------------------------------------------------------------------------------------------------|
